# Supplementary material for: ITS Metabarcoding Reveals the Effects of Oregano Essential Oil on Fusarium oxysporum and Other Fungal Species in Soil Samples
Source: MDPI journal article supplement (doi:10.3390/plants12010062), 2022-12-22
Supplement: s1 [file s1]

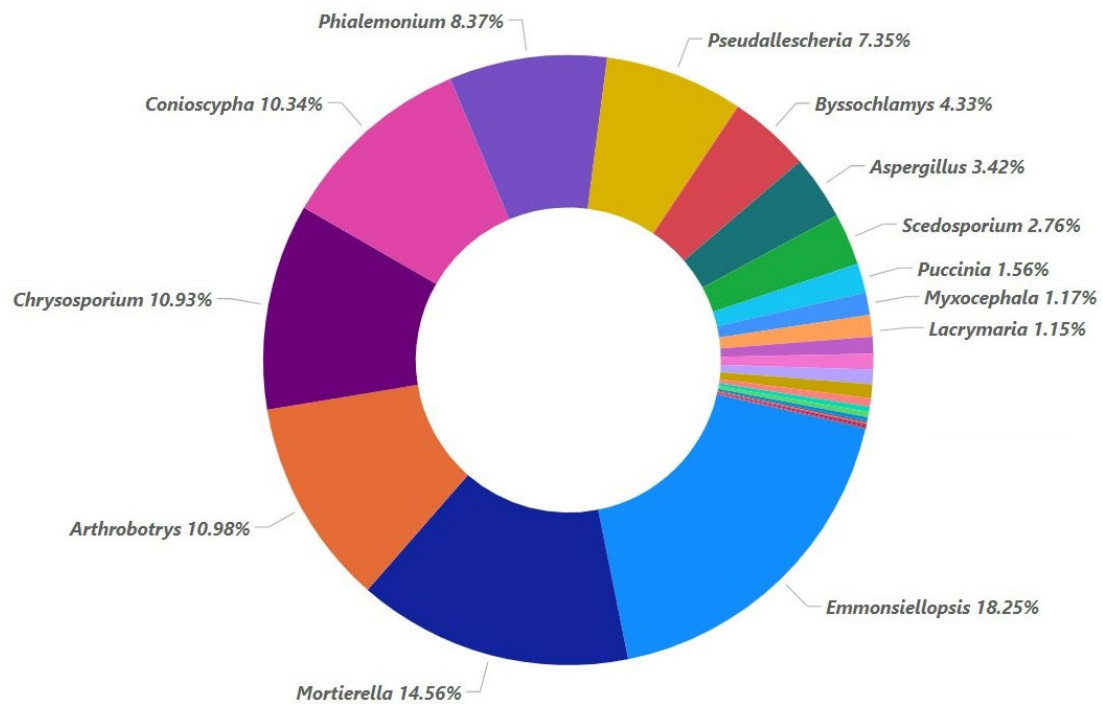

**Figure S1.** Relative abundance with percentages above 1% for Genera taxa, for sample A0.

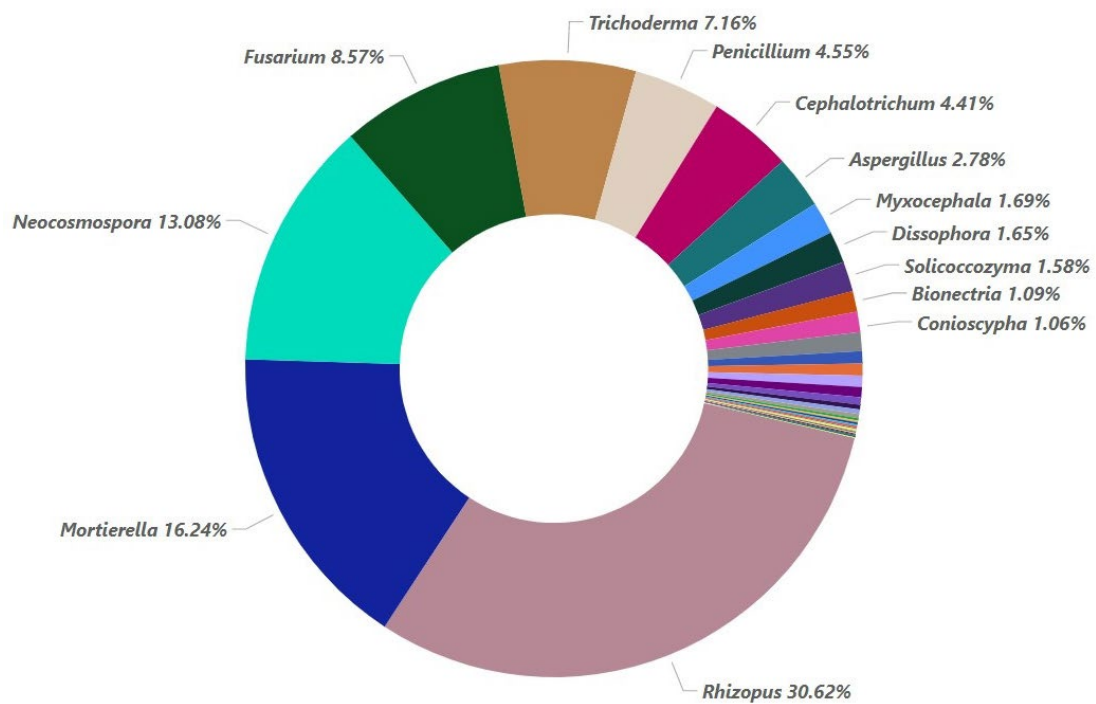

**Figure S2.** Relative abundance with percentages above 1% for Genera taxa, for sample M0.

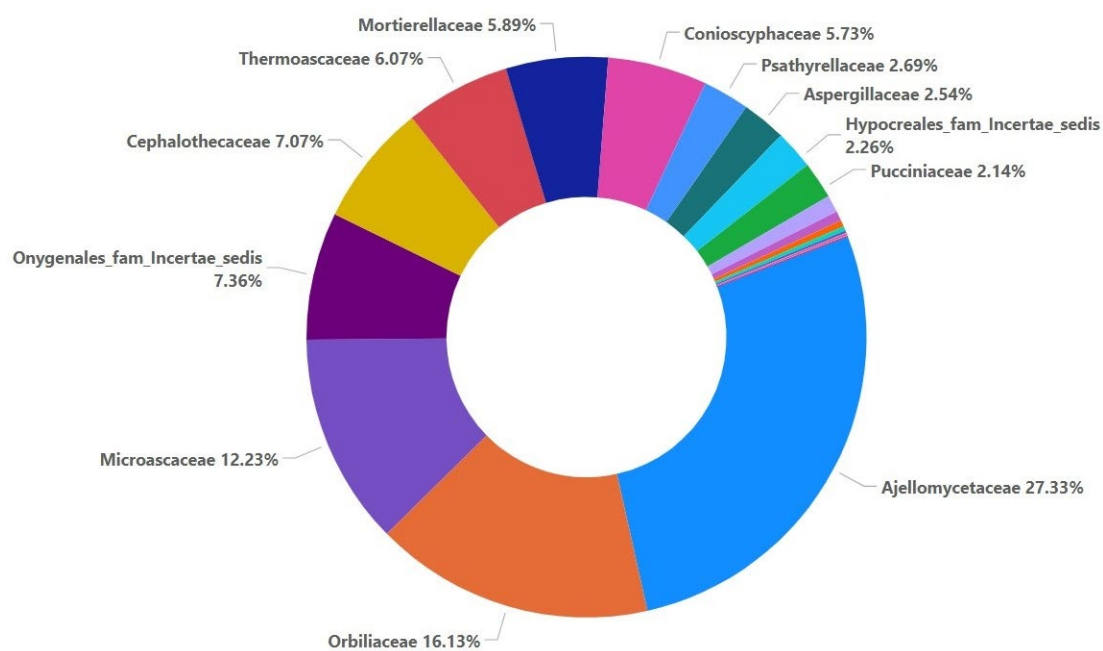

**Figure S3.** Relative abundance with percentages above 1% for Genera taxa, for sample A5.

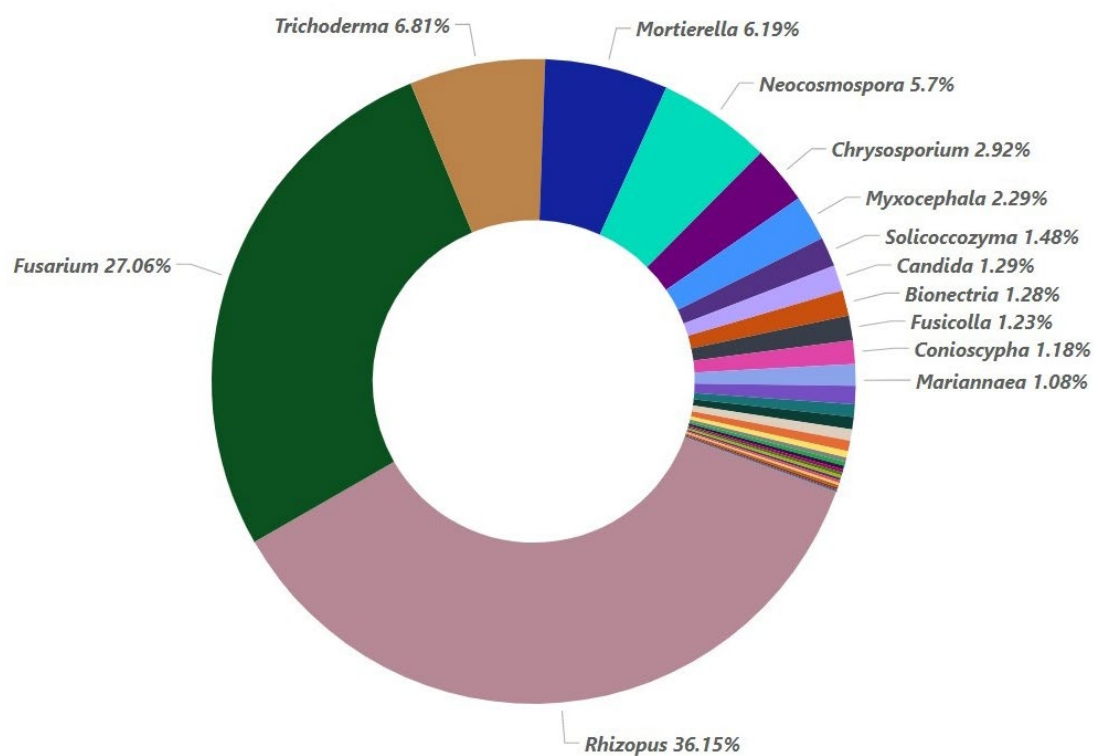

**Figure S4.** Relative abundance with percentages above 1% for Genera taxa, for sample M5.

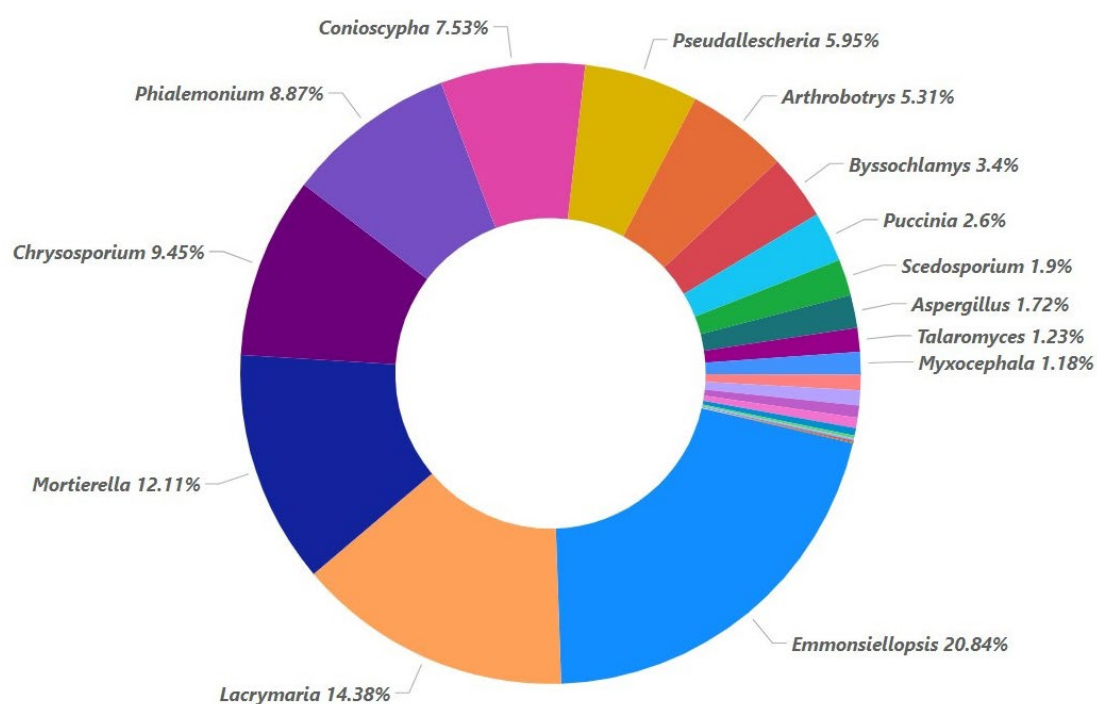

**Figure S5.** Relative abundance with percentages above 1% for Genera taxa, for sample A20.

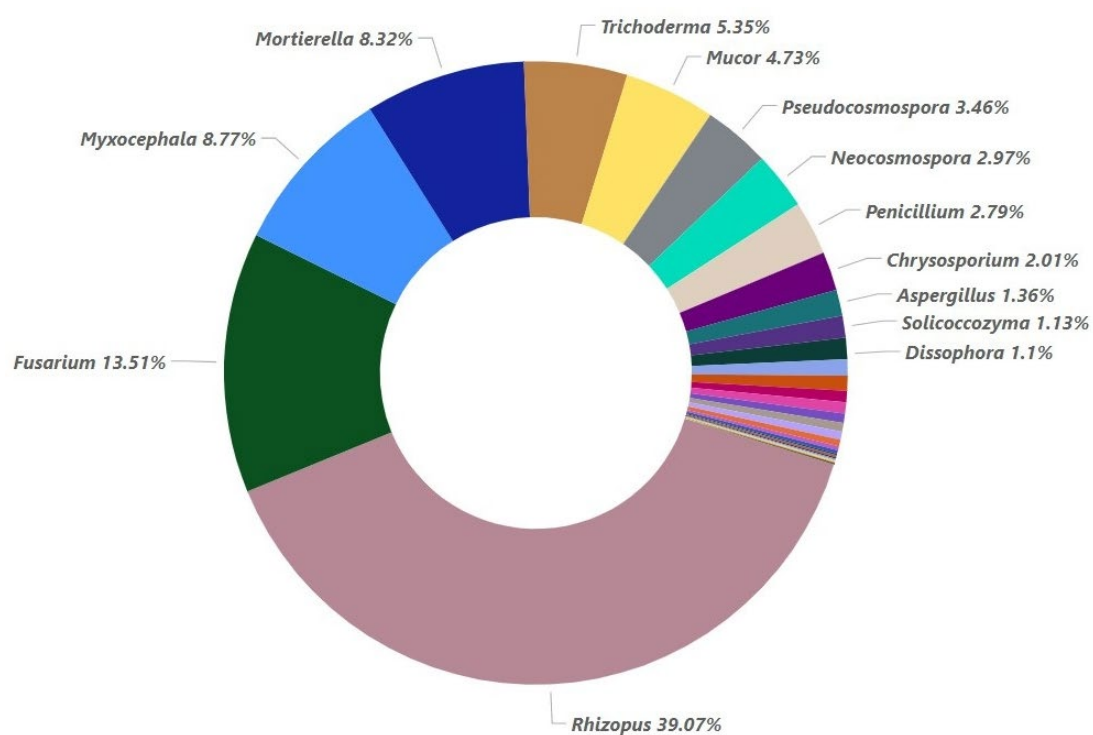

**Figure S6.** Relative abundance with percentages above 1% for Genera taxa, for sample M20.
